# Supplementary material for: Cellular characterisation of advanced osteoarthritis knee synovium
Source: PubMed Central journal article supplement (PMC10463598; doi:10.1186/s13075-023-03110-x), 2023-08-23
Supplement: 13075_2023_3110_MOESM1_ESM.pdf [file 13075_2023_3110_MOESM1_ESM.pdf]

**Additional File 1.** Overview of antibodies used in each antibody panel of flow cytometry analysis.

| Fluochromes    | Detector | Laser  | Panel 1:<br>Mixed | Panel 2:<br>T-cells | Panel 3:<br>Granulocytes | Panel 4:<br>Fibroblasts |
|----------------|----------|--------|-------------------|---------------------|--------------------------|-------------------------|
| eFluor 450     | Blue     | Violet |                   | IL-17AF             | IL-17AF                  | IL-17AF                 |
| BV650          | Red      |        | CD15              | CCR6                | CD15                     |                         |
| BV711          | Far Red  |        | CD45              | CD161               | CD45                     | PDPN                    |
| BV786          | Infrared |        | CD34              | CD56                | CD40                     | CD34                    |
| FITC           | Green    | Blue   | IL-17RC           | IL-17A              | IL-17A                   | IL-17A                  |
| PE             | Yellow   |        | IL-17RA           | GDTCR               | CD11c                    | FAP                     |
| PE-CF594       | Orange   |        | CD19              | IL-17F              | IL-17F                   | IL-17F                  |
| PerCP/Cy5.5    | Red      |        | CD4               | CD4                 | CD117                    | VCAM                    |
| PE-Cy7         | Infrared |        | CD3               | CD3                 | CD68                     | CD90                    |
| APC            | Red      | Red    | CD8               | CD8                 | CD206                    | CD248                   |
| AlexaFluor 700 | Far Red  |        | CD14              | CD45                | CD14                     | CD45                    |
| eFluor 780     | Infrared |        | Viability         | Viability           | Viability                | Viability               |

White = antibody used during extracellular staining; blue = antibody stained during intracellular staining; black = no antibody used; grey = antibodies that were used for staining but not used for final analysis.
