# Supplementary material for: Cellular characterisation of advanced osteoarthritis knee synovium
Source: PubMed Central journal article supplement (PMC10463598; doi:10.1186/s13075-023-03110-x), 2023-08-23
Supplement: 13075_2023_3110_MOESM3_ESM.pdf [file 13075_2023_3110_MOESM3_ESM.pdf]

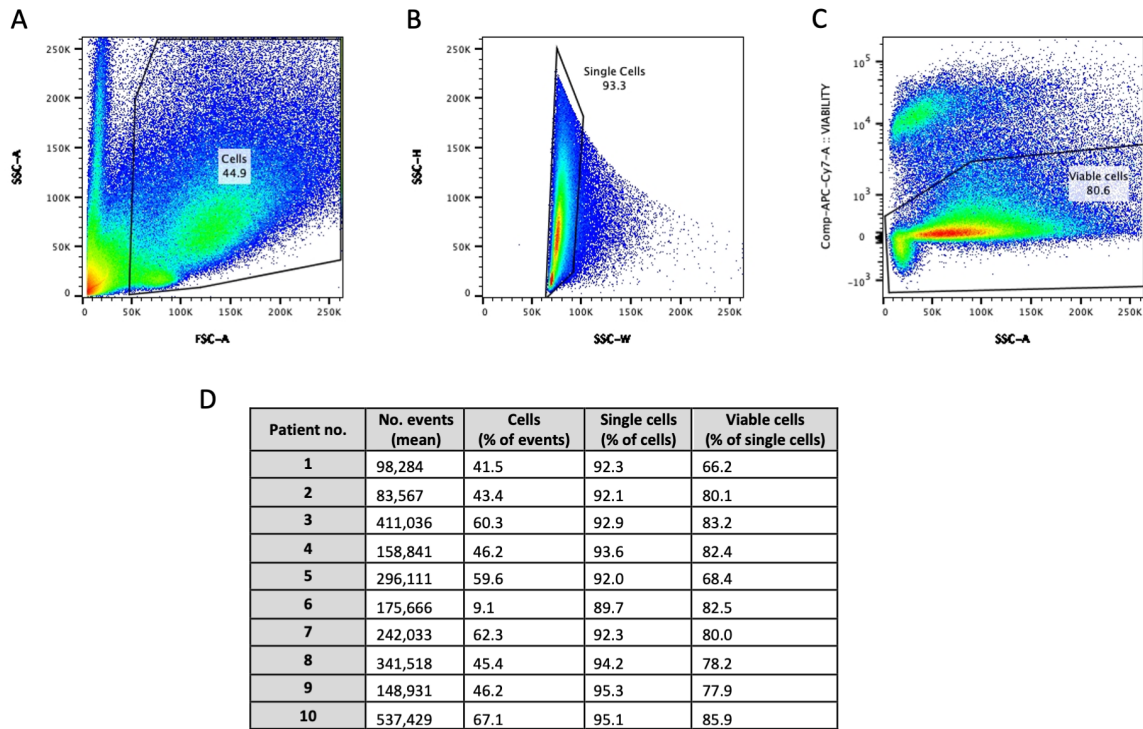

**Additional File 3.** Gating strategy for flow cytometry data. (A) Viable cells were selected by separating cells from debris (SSC-A vs FSC-A), then (B) gating on single cells (SSC-H vs SSC-W), and finally (C) selecting cells negative for the live/dead viability dye (viability dye vs SSC-A). (D) Table of average number of events, cells, single cells, and viable cells for each patient studied.
