# Supplementary material for: Cellular characterisation of advanced osteoarthritis knee synovium
Source: PubMed Central journal article supplement (PMC10463598; doi:10.1186/s13075-023-03110-x), 2023-08-23
Supplement: 13075_2023_3110_MOESM5_ESM.pdf [file 13075_2023_3110_MOESM5_ESM.pdf]

**Additional File 5.** Overview of cell populations in end-stage OA synovium.

| Patient no.         | Lymphocytes (%) | Myeloid cells (%) | CD45+ total (%) | CD45- (%)        |
|---------------------|-----------------|-------------------|-----------------|------------------|
| 1                   | 21.6            | 16.2              | 37.8            | 58.0             |
| 2                   | 7.7             | 8.2               | 15.9            | 82.7             |
| 3                   | 8.2             | 27.8              | 36.0            | 61.9             |
| 4                   | 8.1             | 8.5               | 16.6            | 81.6             |
| 5                   | 11.4            | 19.2              | 30.6            | 67.7             |
| 6                   | 7.2             | 4.3               | 11.5            | 87.6             |
| 7                   | 1.1             | 6.6               | 7.7             | 90.7             |
| 8                   | 9.1             | 5.9               | 15.1            | 83.4             |
| 9                   | 9.2             | 13.1              | 22.3            | 76.7             |
| 10                  | 8.2             | 21.7              | 29.9            | 69.1             |
| <b>Mean (range)</b> | 9.2 (1.1-21.6)  | 13.2 (4.3-27.8)   | 22.3 (7.7-37.8) | 75.9 (58.0-90.7) |

Relative frequencies (%) of CD45 subsets (as explained in Figure 1) as a percentage of viable cells in end-stage OA synovium.
