# Supplementary material for: Cellular characterisation of advanced osteoarthritis knee synovium
Source: PubMed Central journal article supplement (PMC10463598; doi:10.1186/s13075-023-03110-x), 2023-08-23
Supplement: 13075_2023_3110_MOESM7_ESM.pdf [file 13075_2023_3110_MOESM7_ESM.pdf]

**Additional File 7.** Overview of lymphocyte populations in end-stage OA synovium.

| Patient no.    | As % of lymphocytes |            | As % of CD3 cells |             |           |           |
|----------------|---------------------|------------|-------------------|-------------|-----------|-----------|
|                | CD3+                | CD19+      | CCR6+             | CD8+        | CD161+    | GDTCR+    |
| <b>1</b>       | 81.2                | 6.4        | 0.1               | 25.9        | 4.2       | 1.5       |
| <b>2</b>       | 91.0                | 1.6        | 0.6               | 37.9        | 1.1       | 1.1       |
| <b>3</b>       | 77.3                | 15.5       | 29.2              | 34.1        | 0.5       | 2.0       |
| <b>4</b>       | 92.1                | 0.3        | 36.2              | 40.2        | 0.4       | 3.4       |
| <b>5</b>       | 56.6                | 31.1       | 0.0               | 18.9        | 0.1       | N/A       |
| <b>6</b>       | 95.4                | 0.7        | 0.2               | 11.7        | 0.0       | N/A       |
| <b>7</b>       | 85.8                | 3.3        | 35.3              | 39.7        | 1.1       | 1.8       |
| <b>8</b>       | 74.6                | 20.0       | 36.2              | 42.4        | 0.1       | 2.3       |
| <b>9</b>       | 87.5                | 4.9        | 19.2              | 21.4        | 0.2       | 0.2       |
| <b>10</b>      | 76.6                | 10.1       | 26.9              | 28.3        | 0.1       | 0.7       |
| <b>Mean</b>    | 81.9                | 9.4        | 18.4              | 30.1        | 0.8       | 1.6       |
| <b>(range)</b> | (56.6-95.4)         | (0.3-31.1) | (0.02-36.2)       | (11.7-42.4) | (0.0-4.2) | (0.2-3.4) |

Overview of the relative frequencies (%) of CD3+ and CD19+ cells as a percentage of lymphocyte population, and overview of CD3+ subsets.
