# Supplementary material for: Cellular characterisation of advanced osteoarthritis knee synovium
Source: PubMed Central journal article supplement (PMC10463598; doi:10.1186/s13075-023-03110-x), 2023-08-23
Supplement: 13075_2023_3110_MOESM10_ESM.pdf [file 13075_2023_3110_MOESM10_ESM.pdf]

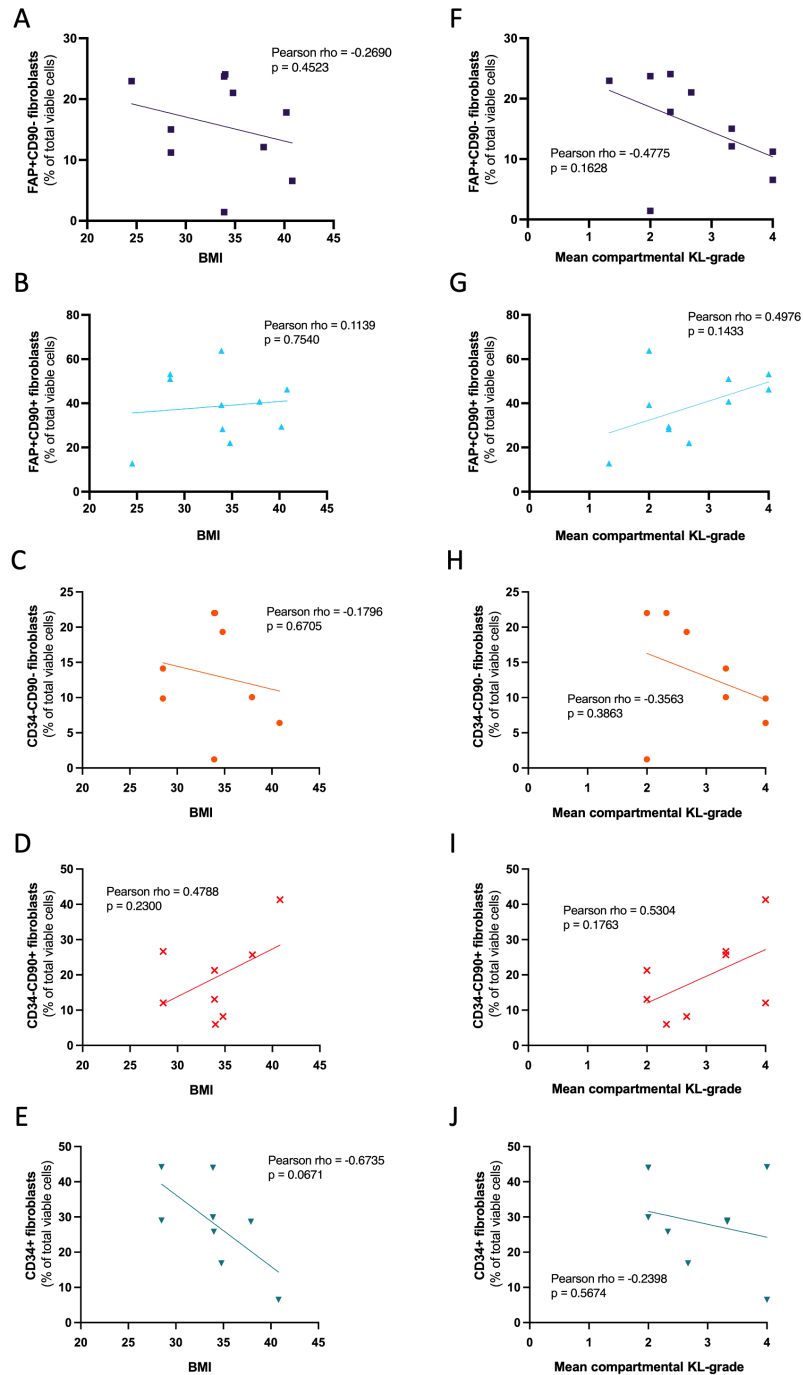

**Additional File 10.** Relationship between the relative frequency of fibroblast subsets (as percentage of all viable cells) and body mass index (BMI) (A-E) or mean compartmental Kellgren-Lawrence (KL)-grade (F-J). Fibroblast subsets (CD45-PDPN+) are FAP+CD90- (A, F), FAP+CD90+ (B, G), CD34-CD90- (C, H), CD34-CD90+ (D, I), and CD34+ (E, J).
