# Supplementary material for: Cellular characterisation of advanced osteoarthritis knee synovium
Source: PubMed Central journal article supplement (PMC10463598; doi:10.1186/s13075-023-03110-x), 2023-08-23
Supplement: 13075_2023_3110_MOESM11_ESM.pdf [file 13075_2023_3110_MOESM11_ESM.pdf]

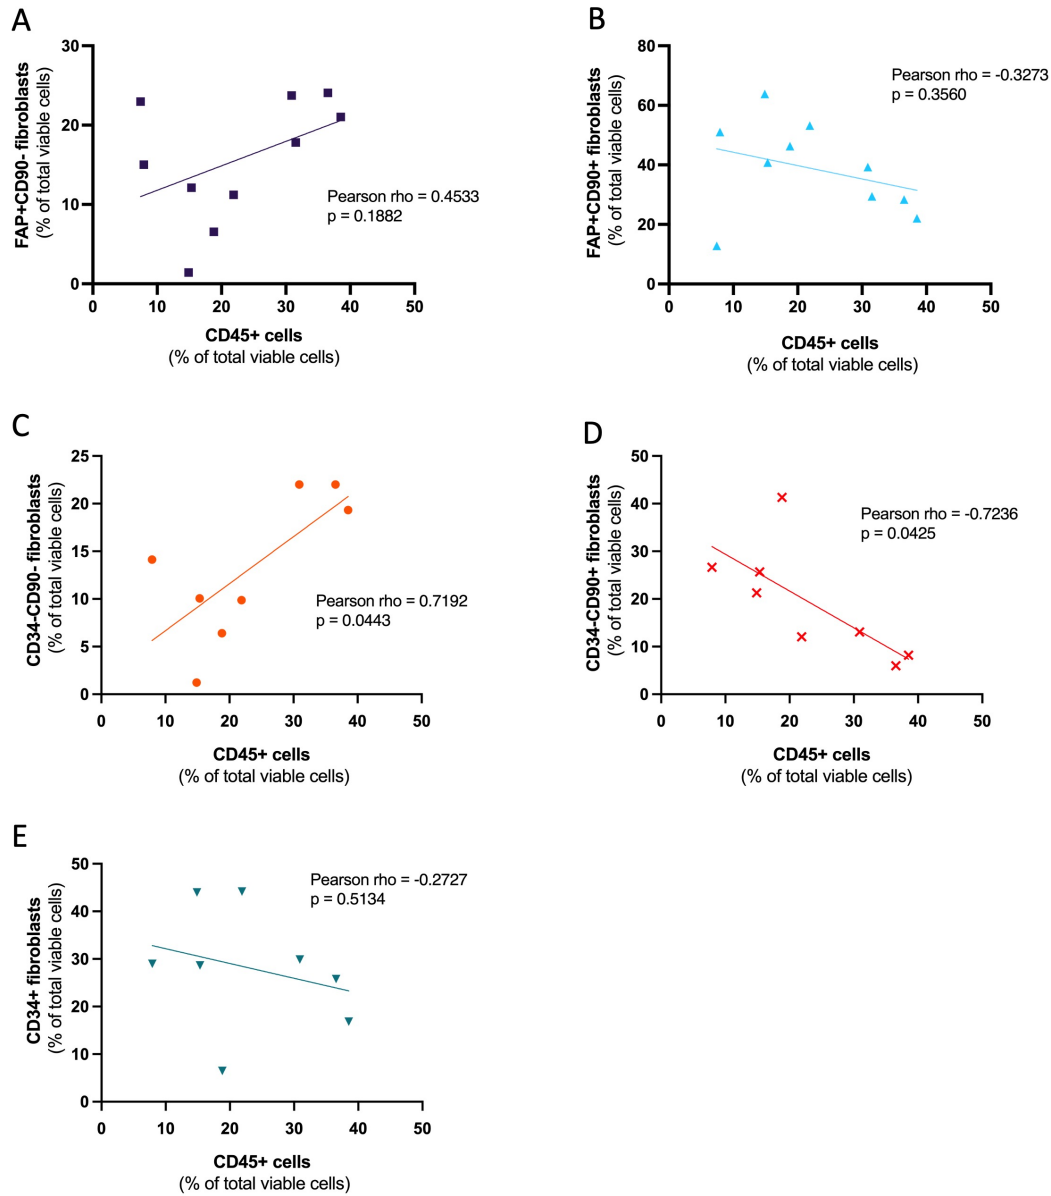

**Additional File 11.** Relationship between fibroblast subsets (as a percentage of all viable cells) and immune cells (CD45+ cells as a percentage of all viable cells). (A) FAP+CD90- fibroblasts, (B) FAP+CD90+ fibroblasts, (C) CD34-CD90- fibroblasts, (D) CD34-CD90+ fibroblasts, and (E) CD34+ fibroblasts.
