# Supplementary material for: Cellular characterisation of advanced osteoarthritis knee synovium
Source: PubMed Central journal article supplement (PMC10463598; doi:10.1186/s13075-023-03110-x), 2023-08-23
Supplement: 13075_2023_3110_MOESM12_ESM.pdf [file 13075_2023_3110_MOESM12_ESM.pdf]

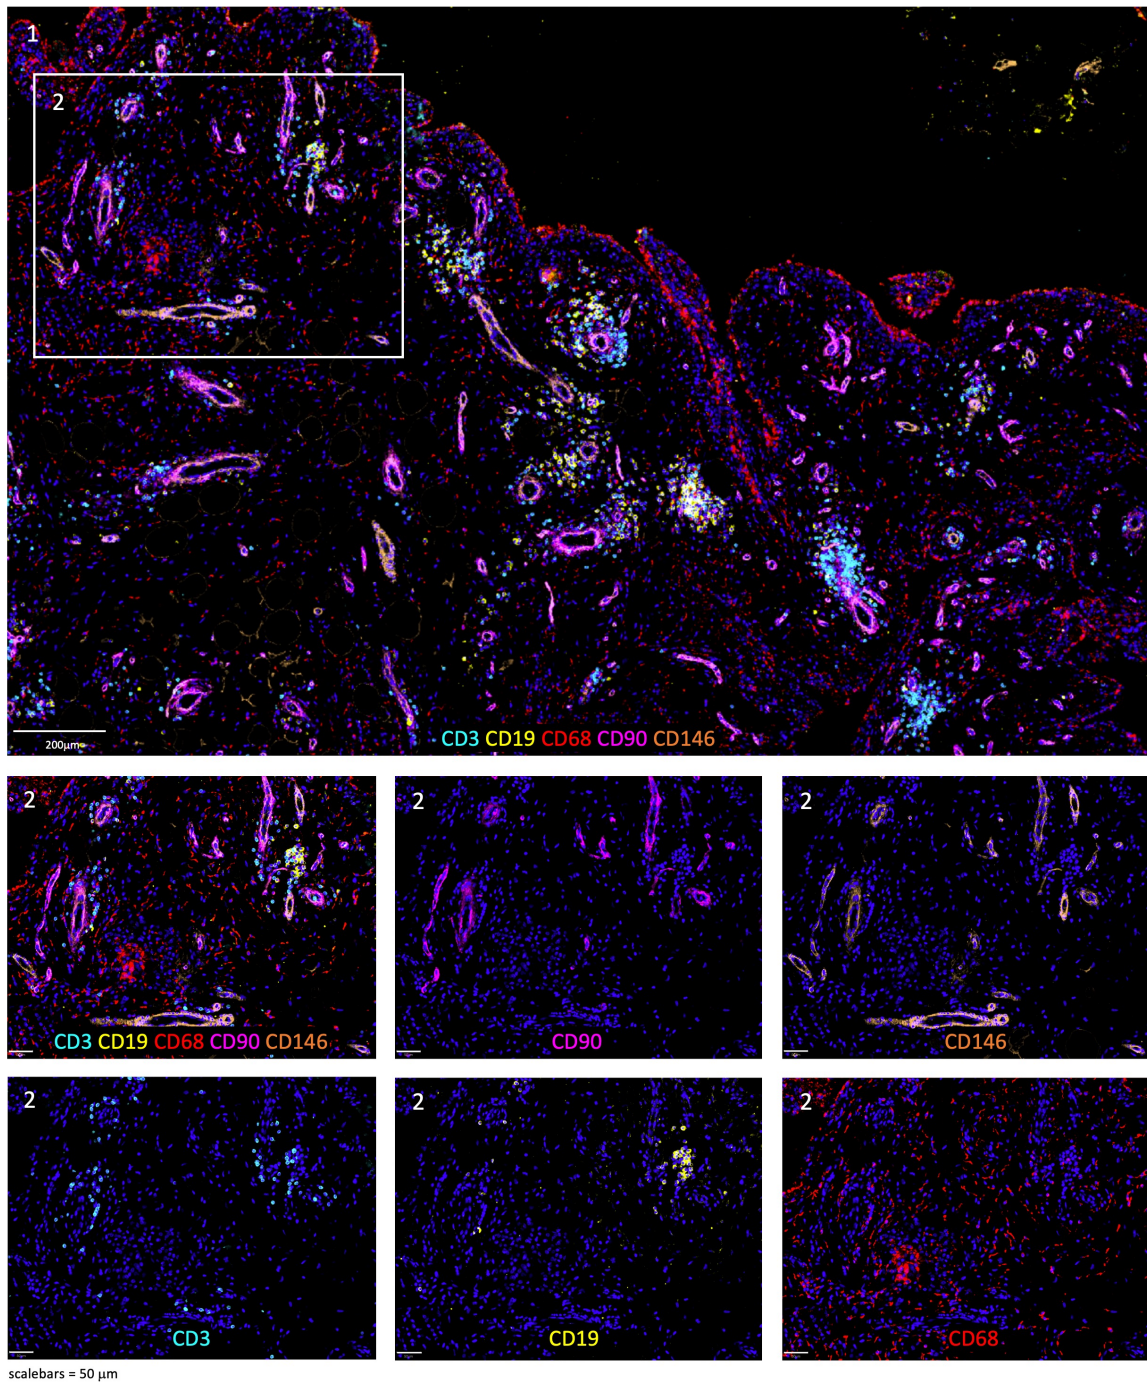

**Additional File 12.** Immunofluorescence staining of CD90 (pink), CD146 (orange), and immune cell markers CD3 (cyan), CD19 (yellow), and CD68 (red) in advanced OA synovium; DAPI staining was used to visualise nuclei.
